1 **Using 3D geometric morphometrics to aid taxonomic and ecological understanding of**  
2 **a recent speciation event within a small Australian marsupial (genus *Antechinus*)**

3 Pietro Viacava<sup>1</sup>, Andrew M. Baker<sup>2,3</sup>, Simone P. Blomberg<sup>1</sup>, Matthew J. Phillips<sup>2</sup> and  
4 Vera Weisbecker<sup>4</sup>

5 <sup>1</sup>School of Biological Sciences, The University of Queensland, St Lucia, Queensland, Australia

6 <sup>2</sup>School of Biology and Environmental Science, Queensland University of Technology, Brisbane,  
7 Queensland, Australia

8 <sup>3</sup>Natural Environments Program, Queensland Museum, PO Box, 3300, South Brisbane, QLD 4101,  
9 Australia

10 <sup>4</sup>College of Science and Engineering, Flinders University, Adelaide, South Australia, Australia

11

12 **Abstract**

13 Taxonomic distinction of species forms the foundation of biodiversity assessments and  
14 conservation priorities. However, traditional morphological and/or genetics-based taxonomic  
15 assessments frequently miss the opportunity of elaborating on the ecological and functional  
16 context of species diversification. Here, we used 3D geometric morphometrics of the cranium  
17 to improve taxonomic differentiation and add eco-morphological characterisation of a young  
18 cryptic divergence within the marsupial carnivorous genus *Antechinus*. Specifically, we used  
19 168 museum specimens to characterise the recently proposed clades *A. stuartii* “south”, *A.*  
20 *stuartii* “north” and *A. subtropicus*. Beyond slight differences attributable to overall size (and  
21 therefore not necessarily diagnostic), we also found clear allometry-independent shape  
22 variation. This allowed us to define new, easily measured diagnostic traits in the palate, which  
23 differentiate the three clades. Contrary to previous suggestions, we found no support for a  
24 latitudinal gradient as causing the differentiation between the clades. However, skull shape  
25 co-varied with temperature and precipitation seasonality, suggesting that the clades may be  
26 adapted to environmental variables that are likely to be impacted by climate change. Our study  
27 demonstrates the use of 3D geometric morphometrics to improve taxonomic diagnosis of  
28 cryptic mammalian species, while providing perspectives on the adaptive origins and potential  
29 future threats of mammalian diversity.

30 **Keywords:** antechinus ecology - antechinus taxonomy - conservation - cryptic species –  
31 ecomorphology - geometric morphometrics - Procrustes ANOVA - shape variation - variation  
32 partitioning

### 33 I. Introduction

34 Mammalian biodiversity is globally under threat due to anthropogenic impacts, which  
35 include changing patterns of temperature and rainfall, and increased frequency and duration  
36 of extreme bushfires (Bowman *et al.*, 2020). In terms of species loss, the Australian  
37 mammalian fauna is globally the most affected due to widespread environmental degradation  
38 (Woinarski, Burbidge, & Harrison, 2015) from introduced species, agriculture, logging and  
39 extreme vegetation fire events (Pardon *et al.*, 2003; Letnic, Tamayo, & Dickman, 2005; Firth  
40 *et al.*, 2010; Pastro, 2013; Crowther *et al.*, 2018; Radford *et al.*, 2018; Murphy *et al.*, 2019).  
41 Furthermore, Australia is predicted to endure increasingly frequent fire-weather and extreme  
42 droughts (Di Virgilio *et al.*, 2019; Dowdy *et al.*, 2019; Ukkola *et al.*, 2020; Kirono *et al.*, 2020).  
43 The east coast of Australia is particularly vulnerable in terms of biodiversity loss: the 2019-  
44 2020 mega-fires of south-eastern Australia destroyed habitat within the distribution of 832  
45 vertebrate taxa, of which 83 were mammalian species (Ward *et al.*, 2020). Hence, the  
46 implementation of widespread conservation efforts for over one hundred threatened Australian  
47 mammal species is a high priority (Legge *et al.*, 2018).

48 The planning of such conservation efforts relies on a good understanding of what  
49 species inhabit the most affected environments. However, the advent of modern molecular  
50 methods is driving the discovery of previously unrecognized “cryptic” species and is  
51 increasingly pointing towards unexpectedly high biodiversity losses, with taxa at risk of  
52 extinction shortly after, or even before, discovery (May, 1988; Dubois, 2003). This particularly  
53 affects many species that are considered to be “known” but may eventually undergo taxonomic  
54 revision with the development of more accurate taxonomic methods (Bickford *et al.*, 2007;  
55 Chaplin *et al.*, 2020). Thus, we may be underestimating well-studied species initially classified

56 as not threatened that may instead contain evolutionary lineages sufficiently distinct to deserve  
57 re-examination of their conservation status.

58         The issue of unrecognised biodiversity goes beyond the fundamental question of how  
59 many species exist. Characterising the phenotypic diversity in closely related species is also  
60 essential for understanding their interaction with the environment – that molecular data alone  
61 does not provide – and the reason for the species divergence. However, the phenotypic  
62 diversity in young species is generally measured using well-established morphological  
63 diagnostics (e.g., Baker, Mutton, & Van Dyck, 2012; Baker *et al.*, 2012; Baker, Mutton, &  
64 Hines, 2013) that were designed with a view to species differentiation, rather than the  
65 processes that may have led to phenotypic divergence. In order to identify conservation units  
66 worthy of protection, we need to understand the ecological processes that may lead to species  
67 diversification – in fact, ecological exchangeability is a defining factor of Evolutionary  
68 Significant Units (Crandall *et al.*, 2000; Fraser & Bernatchez, 2001; de Guia & Saitoh, 2007).  
69 In particular, population divergence and speciation is widely known to occur in association with  
70 certain ecological boundaries. For example, in coastal eastern Australia, the Brisbane Valley  
71 represents a biogeographic break (Bryant & Krosch, 2016) for divergence of arthropods  
72 (Lucky, 2011; Rix & Harvey, 2012), reptiles (Chapple, Chapple, & Thompson, 2011a; Chapple  
73 *et al.*, 2011b), amphibians (McGuigan *et al.*, 1998; James & Moritz, 2000) and mammals  
74 (Bryant & Fuller, 2014); the Clarence River Corridor (Bryant & Krosch, 2016) is also known  
75 for the divergence of reptiles (Colgan, O’Meally, & Sadler, 2010) and mammals (Rowe *et al.*,  
76 2012; Frankham, Handasyde, & Eldridge, 2012). Thus, assessing the ecological interaction  
77 and the distribution of morphologically diversified vertebrate taxa, particularly across  
78 biogeographic breaks, is key to understanding the role of biotic and abiotic factors in the  
79 divergence of these species.

80         The marsupial mammal genus *Antechinus* (MacLeay, 1841) is a case in point of  
81 unrecognised diversity located on the Australian east coast. Antechinuses are small,  
82 scansorial and insectivorous marsupials (Lee & Cockburn, 1985), which play an important role

83 as pollinators (Goldingay, Carthew, & Whelan, 1991; Goldingay, 2000). The genus also  
84 displays the unusual trait of semelparity, where all males die after an annual 1-3 week mating  
85 period (Kraaijeveld- Smit, Ward, & Temple- Smith, 2003; Holleley *et al.*, 2006; Fisher *et al.*,  
86 2013). Antechinuses are also predicted to be particularly susceptible to changes in rainfall  
87 patterns: members of this genus synchronize their only mating event in the life of a male with  
88 rainfall-dependant peaks of insect abundance (Fisher *et al.*, 2013).

89 Antechinus species are a good example of accelerated biodiversity recovery in the wake  
90 of recent advances in molecular biology (Baker & Dickman, 2018). Several species in the  
91 genus have recently been taxonomically re-described and others have been discovered,  
92 expanding their known diversity from 10 to 15 species since 2012 (Baker *et al.*, 2012, 2013,  
93 2014, 2015; Baker & Van Dyck, 2013a,b,c, 2015), with two of these classified as federally  
94 Endangered (*Antechinus arktos* and *Antechinus argentus*) (EPBC Act, 1999; Geyle *et al.*,  
95 2018).

96 The species complex *Antechinus stuartii* has been a focus of taxonomic change since its  
97 description by MacLeay in 1841. Five species are currently recognized to have been once part  
98 of *A. stuartii* (*sensu lato*): *Antechinus flavipes* (Waterhouse, 1837) (see in Baker & Van Dyck,  
99 2013b); *Antechinus adustus* (Thomas, 1923) (see in Van Dyck & Crowther, 2000); *Antechinus*  
100 *agilis* Dickman *et al.*, 1998, *Antechinus subtropicus* Van Dyck & Crowther, 2000 and *A. stuartii*  
101 MacLeay, 1841 (*sensu stricto*; see in Jackson & Groves, 2015). Notably, the difficulties with  
102 taxonomic resolution have been driven by a lack of phenotypic differentiation; for instance, *A.*  
103 *stuartii* and *A. agilis* were still thought to be morphologically cryptic until near the end of the  
104 century (Sumner & Dickman, 1998). Further taxonomic clarification of *A. stuartii* has recently  
105 been recommended after genetic studies revealed multiple lineages (Mutton *et al.*, 2019).

106 Previous traditional morphological work (including linear measurements and discrete  
107 characters) found a subtle differentiation between *A. subtropicus* and *A. stuartii*, particularly in  
108 cranial size, rostral proportions and palatal morphology (Van Dyck & Crowther, 2000),  
109 although the morphological differences were not clearly defined. However, subsequent

110 molecular work (Mutton *et al.*, 2019) suggested that *A. stuartii* contains two lineages and is  
111 paraphyletic: *A. subtropicus* and an *A. stuartii* north clade appear genetically more closely  
112 related to the exclusion of the *A. stuartii* south clade (Figure 1). These taxa have apparently  
113 arisen from a recent speciation event dated from the Pleistocene (~ 2 Mya) (Mutton *et al.*,  
114 2019). Further morphological evidence is therefore required to assess the taxonomy of the  
115 northern and southern *A. stuartii* clades and to examine the relationship of both these taxa  
116 with *A. subtropicus*.

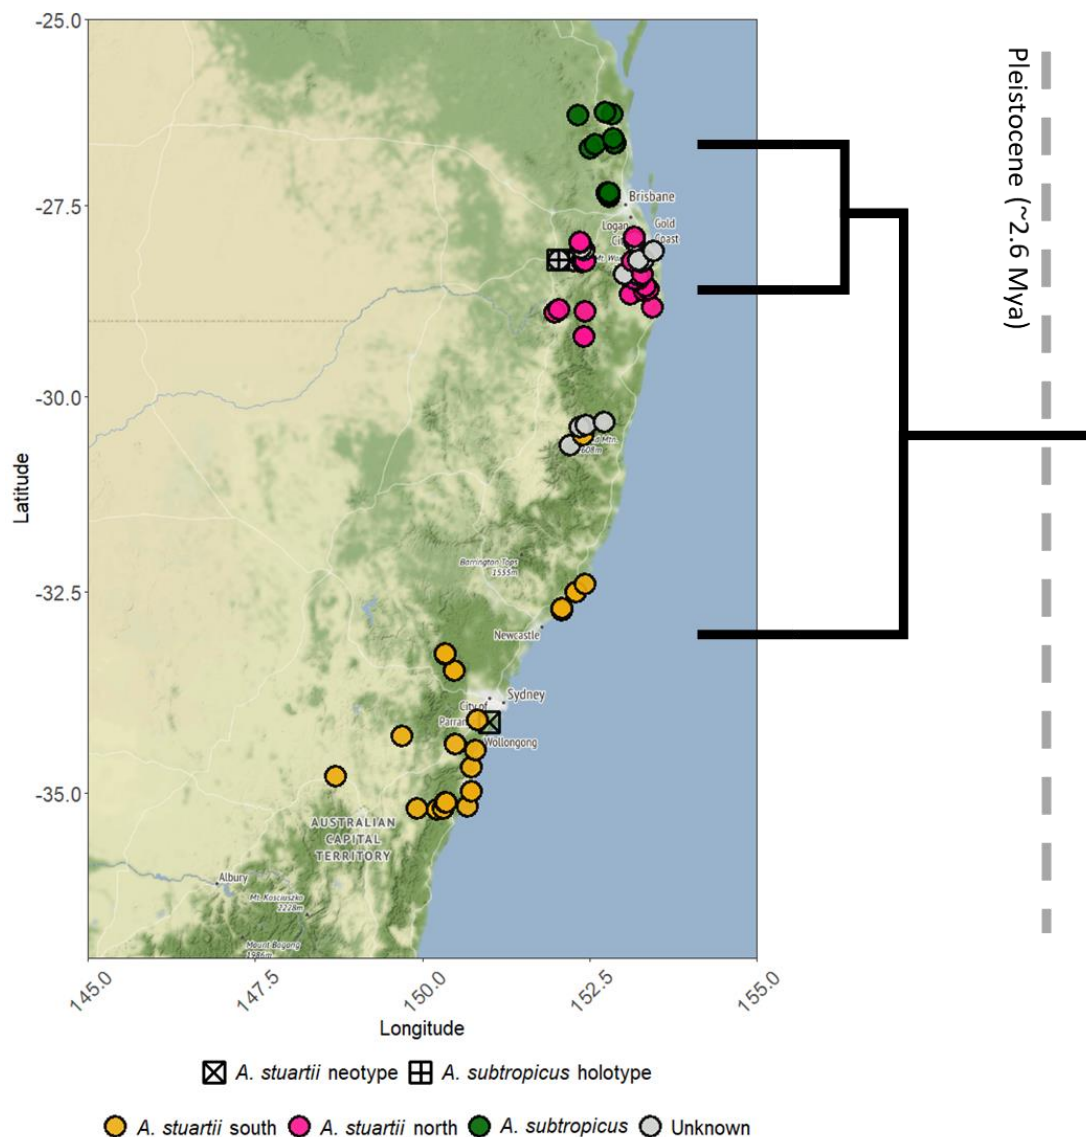

117

118 **Figure 1:** Distribution map of the specimens used for this study. Labelled are *A. stuartii* south,  
119 *A. stuartii* north, *A. subtropicus*, specimens of unknown identity within the *A. stuartii* - *A.*  
120 *subtropicus* species complex, the holotype of *A. subtropicus* and the neotype of *A. stuartii*. All  
121 figures in this paper are labelled: *A. stuartii* south in orange, *A. stuartii* north in pink and *A.*  
122 *subtropicus* in green. The phylogeny is adapted from Mutton *et al.* (2019).

123 The *Antechinus stuartii* species complex presents a unique opportunity to assess  
124 morphological differentiation at the boundaries of a complex of young, closely related species.  
125 Because they apparently occur along a latitudinal cline, the *A. stuartii* complex also provides  
126 the context for an assessment of ecological and geographic factors that drive species  
127 differentiation and are the chief predictors of future species distributions. In this study, we take  
128 advantage of 3D geometric morphometrics to investigate the morphological diversification  
129 within the *A. stuartii* – *A. subtropicus* complex. The benefit of geometric morphometrics over  
130 conventional morphological measurements in this context is that it allows a global assessment  
131 of shape retained through variation and differentiation analyses, with graphical depictions  
132 permitting accurate biological interpretations (Adams, Rohlf, & Slice, 2013). We therefore aim  
133 to: a) test for corroboration of the genetically known clades with dependable morphological  
134 differentiators (taxonomic aspect); b) evaluate the environmental drivers associated within and  
135 between clades (ecomorphological aspect); and c) infer an evolutionary hypothesis for the  
136 speciation events (evolutionary aspect).

## 137 II. **Material and methods**

### 138 a) ***Data collection***

139 Our study included 168 3D models of adult individuals (determined by complete P3  
140 premolar tooth eruption). These included specimens of *Antechinus subtropicus* (n = 68; 41  
141 males, 25 females and 2 of unknown sex), *Antechinus stuartii* north (n = 30; 16 males, 12  
142 females and 2 of unknown sex), *Antechinus stuartii* south (n = 38; 15 males, 22 females and  
143 1 of unknown sex) and *A. subtropicus* / *A. stuartii* where clades were unassigned (n = 32; 19  
144 males, 8 females and 5 of unknown sex). To determine clade groupings, first, specimens were  
145 assigned a species (*A. subtropicus* or *A. stuartii*) following identification by museum curators.  
146 Second, we corroborated this information with specimens that were assigned a clade  
147 genetically in the literature. Third, we assigned the remaining specimens following the  
148 presumed distribution of the clades, as they are largely geographically non-overlapping  
149 (Mutton *et al.*, 2019). To assign *A. stuartii* specimens to the northern or southern lineage, we

150 relied on the locality in which they were captured (the lineages are largely geographically non-  
151 overlapping, with a narrow zone of sympatry) and genetic analyses (two mtDNA and four  
152 autosomal nuclear genes) of population representatives sourced from Mutton et al. (2019).  
153 We left a range of specimens unassigned when their source populations were not genetically  
154 determined or when they were not genetically determined and were captured at localities near  
155 the narrow clades overlap zones. Because of the current lack of clarity around whether the  
156 genetic lineages of *A. stuartii* “north” and “south” represent true species, we refer to the three  
157 taxonomic units of *A. stuartii* “north”, *A. stuartii* “south”, and *A. subtropicus* as “clades”  
158 throughout this manuscript.

159 We used a GoMeasure 3D HDI109 blue light surface scanner (LMI Technologies Inc.  
160 Vancouver, Canada) to create the 3D models. This scanner was portable, allowing us to carry  
161 it to museum collections around Australia (Queensland Museum, Australian Museum and  
162 Australian National Wildlife Collection). Scanning was undertaken according to protocols  
163 developed by Marcy *et al.* (2018) and Viacava *et al.* (2020). We placed each skull specimen  
164 in 3 different orientations on a motorised rotary table turning every 45 degrees (8 rotations per  
165 round). We meshed together the 24 resulting 3D models with the scanner’s software  
166 FLEXSCAN3D 3.3 to produce a final 3D model of the complete skull. This 3D model was then  
167 cleaned, decimated and reformatted following Viacava *et al.*’s (2020) protocol. Photographs  
168 of each specimen helped identify landmarks – for example, we were able to discriminate the  
169 nasal-maxillary suture, visible in photographs, from non-biological 3D artefacts.

170 The landmarking template is an adaptation of Viacava *et al.*’s (2020) template based  
171 on another dasyurid, the northern quoll (*Dasyurus hallucatus*). This template consists of 412  
172 landmarks: 82 fixed landmarks, 63 curves (185 semilandmarks) and 9 surface patches (145  
173 semilandmarks) (see landmark locations and their anatomical definitions in Supplementary  
174 Figure 5 and Supplementary Table 1, respectively). We avoided landmarking the zygomatic  
175 arches because their thin geometry was not captured well at the scanner’s resolution.  
176 Moreover, the preparation of the skeleton can cause errors on small specimens because

177 zygomatic arches can warp after losing support from the muscles during dehydration  
178 (Yezerinac, Lougheed, & Handford, 1992; Schmidt *et al.*, 2010). However, the acquisition of  
179 a substantial number of specimens and generous coverage of the anatomical zones  
180 surrounding the zygomatic arches have been shown to surmount this issue (Marcy *et al.*,  
181 2018).

182 All fixed landmarks and curves were manually registered by P. V. in Viewbox version  
183 4.0 (dHAL software, Kifissia, Greece). Curve semilandmarks were projected onto the curves,  
184 placed equidistantly and were finally slid along their respective curves in Viewbox. Surface  
185 semilandmarks followed a thin-plate spline interpolation between the template and each  
186 specimen, then were projected to the surface and were finally slid. All sliding procedures were  
187 performed following minimization of the bending energy (Bookstein, 1997).

## 188 **b) Analyses**

189 We analysed the 3D raw coordinates in R version 3.6.3 (R Core Team, 2019), using the  
190 packages “geomorph” (version 3.1.3) (Adams & Otárola- Castillo, 2013), “Morpho” (version  
191 2.7) (Schlager *et al.*, 2019) and “landvR” (version 0.5) (Guillerme & Weisbecker, 2019). The  
192 first step was to translate, rotate and scale all specimens to the same size by performing a  
193 Generalized Procrustes Analysis (GPA). This method results in the decomposition of centroid  
194 size and isometry-free shape variation for further analyses (Rohlf & Slice, 1990). Thus, shape,  
195 as defined by Kendall (1989), is the resultant of the form of the object minus its isometric  
196 component. To analyse shape in each Kendall’s morphospace, we performed this GPA step  
197 for all specimens and also for the corresponding subsets. For example, when only specimens  
198 of known sex or group were considered, the superimposed dataset changed by leaving aside  
199 those specimens that were unidentified by sex or group. Note that all analyses involving  
200 permutations were set to 1000 iterations, and that Bonferroni adjustments of  $p$ -values were  
201 used to correct for tests involving multiple comparisons .

## 202 ***Size, allometry and sexual dimorphism***



203 We performed pairwise comparisons between the centroid size least squares means  
204 of each clade to assess if the skulls of each clade were differently sized. Note that centroid  
205 sizes were within the same order of magnitude, such that log-transformation was not deemed  
206 necessary.

207 We evaluated the influence of size on shape (allometry – the component of shape that  
208 depends on size but is not isometric) in the entire dataset with a Procrustes ANOVA. We then  
209 used a Homogeneity of Slopes Test to assess whether the allometric slopes differed between  
210 sexes and clades. If this was not the case and they shared a common allometric slope, this  
211 would enable us to evaluate allometry-free (i.e. free of shape patterns associated to allometry)  
212 shape differences between sexes and clades. The latter step requires additional Procrustes  
213 ANOVAs including size as a first and sex or clade as a second predictor variable (Table 1).

214

### 215 ***Inter- and intra-group shape variation***

216 To explore the patterns of the main shape variation and to assess whether it  
217 corresponded to clade boundaries, we conducted a Principal Component Analysis (PCA) on  
218 the landmark coordinates. We labelled the groups in the plot of the First and Second Principal  
219 Component (PC) scores. We then conducted a Procrustes ANOVA to test whether the groups  
220 were morphologically different. We then performed permutation-based pairwise comparisons  
221 between mean shapes of these groups.

222 We also performed pairwise comparisons of disparity to evaluate if the clades and  
223 sexes differed in morphospace occupancy. Several measurements of disparity are possible  
224 (Guillerme *et al.*, 2020), but here we consider the widely-used Procrustes variance. This asks  
225 if the residuals of a common linear model fit differ in magnitude between groups, which is  
226 possible even if there are no significant differences in shape between groups.

227 Additionally, we aimed to determine the linear distances between landmarks that our  
228 analyses suggested to be the most variable between clades. The linear measurements that

229 best distinguish the clades were determined by creating heat maps of landmark displacement  
230 between the mean shapes of each clade (which is also what is used to determine statistical  
231 differences between clades in Procrustes ANOVAs). We coloured landmarks according to  
232 how great the displacement is between shapes for each landmark (see the “landvR” package  
233 for details) (Guillerme & Weisbecker, 2019). The darkest, most displaced among the  
234 landmarks were chosen as candidates for linear measurements to differentiate clades. The  
235 goal was to provide a measure of shape differentiation between clades that was easily  
236 reproducible in taxonomic museum work. To test for differences between clades, we ran a  
237 linear model of these linear distances against centroid size to correct for size, and performed  
238 post hoc Tukey multiple comparison tests between means of the clades.

239

#### 240 ***Ecomorphological characterisation***

241 We conducted a variation partitioning analysis of cranial shape for variables that  
242 potentially contribute to cranial shape variation. The factors included in the final model were  
243 size (as centroid size), the geographic distances among specimens (based on location of  
244 capture) and four environmental variables (temperature, temperature seasonality,  
245 precipitation and precipitation seasonality). Elevation was initially included as a geographic  
246 factor but did not have a clear effect on shape variation and was therefore not retained in the  
247 final model. We avoided spatial autocorrelation by transforming the latitude and longitude  
248 coordinates of each individual into a principal coordinates neighbourhood matrix (Borcard &  
249 Legendre, 2002) and retaining only the axes with positive eigenvalues. We tested for  
250 significance in shape variation of the selected axes and included those that were significant in  
251 the final variation partitioning model of shape variation. We obtained the environmental  
252 variables from the Atlas of Living Australia ([www.ala.org.au](http://www.ala.org.au)) and WORLDCLIM (v 2.0)  
253 ([www.worldclim.org/bioclim](http://www.worldclim.org/bioclim)) (O'Donnell & Ignizio, 2012). Temperature seasonality (BIO4) is  
254 calculated as the standard deviation of the monthly mean temperatures to the mean monthly  
255 temperature. Precipitation seasonality (BIO15) is calculated as the ratio of the standard

256 deviation of the monthly total precipitation to the mean monthly total precipitation. Both  
257 seasonality variables are known as coefficients of variation and are expressed as a  
258 percentage. To partition the shape variation with respect to these environmental variables, we  
259 used the *varpart* function in the “vegan” package for R version 3.6.3 (Oksanen *et al.*, 2018).  
260 We complemented this analysis with a redundancy analysis ordination on partial and full  
261 models (1000 permutations). Finally, to discern how each environmental variable influences  
262 shape, we performed a separate variation partitioning analysis of cranial shape with only the  
263 four environmental variables.

### 264 **III. Results**

#### 265 ***Allometry and sexual dimorphism***

266 The statistics for all the following results are shown in Table 1. In the entire dataset,  
267 Procrustes ANOVA revealed that size accounted for 13.3 % of the shape variation ( $R^2 = 0.133$ ;  
268  $p = 0.001$ ). Males were significantly larger than females (also see boxplots in Supplementary  
269 Figure 1). Without allometric correction, we found small shape differences between sexes.  
270 However, both sexes followed the same allometric slope, allowing us to test if the sexual shape  
271 differences were only due to the differential size between sexes. After accounting for size, no

272 **Table 1:** ANOVA on predictors of size variation and Procrustes ANOVA on predictors of shape variation.

| RESPONSE VARIABLE | PREDICTOR VARIABLE | QUESTION                                                                           | D. F. | SS     | R <sup>2</sup> | F      | Pr(>F)  | INTERPRETATION                               |
|-------------------|--------------------|------------------------------------------------------------------------------------|-------|--------|----------------|--------|---------|----------------------------------------------|
| Size              | Clade              | Are clades different in size?                                                      | 2     | 5104.8 | 0.338          | 33.925 | 0.001   | Clear effect.                                |
|                   | Sex                | Are sexes different in size?                                                       | 1     | 5184.7 | 0.352          | 71.46  | < 0.001 | Clear effect.                                |
| Shape             | Clade              | Are clades different in shape?                                                     | 2     | 0.017  | 0.143          | 11.082 | 0.001   | Clear effect.                                |
|                   | Size               | Is there allometry?                                                                | 1     | 0.016  | 0.133          | 20.477 | 0.001   | Clear effect.                                |
|                   | Sex                | Are sexes different in shape?                                                      | 1     | 0.004  | 0.038          | 5.051  | 0.001   | Low effect sizes and low variance explained. |
|                   | Size : Sex         | As there is sexual dimorphism and allometry, do sexes differ in allometric slopes? | 1     | 0.001  | 0.006          | 0.907  | 0.587   | No clear effect.                             |
|                   | Size + Sex         | Adjusting for size, are sexes different in shape?                                  | 1     | 0.001  | 0.013          | 1.946  | 0.016   | Low effect sizes and low variance explained. |
|                   | Size : Clade       | Do clades differ in allometric slopes?                                             | 2     | 0.001  | 0.012          | 1.014  | 0.433   | No clear effect.                             |
|                   | Size + Clade       | Adjusting for size, are clades different in shape?                                 | 2     | 0.01   | 0.085          | 7.175  | 0.001   | Clear effect.                                |

273

274 clear differences were found between sexes. Thus, size differences between males and  
275 females almost entirely account for the shape differences between sexes.

276 Centroid size differences were clear only between the larger *A. subtropicus* and the  
277 smaller *A. stuartii* (see also boxplots in Figure 2). Before allometric correction, 14.3% of shape  
278 variation of the sample was associated with shape differentiation between clades. As with  
279 sexes, the clades followed a common allometric slope allowing us to test if the shape  
280 differences between clades were purely due to allometry. Unlike the sex comparisons, this  
281 was not the case: allometry-free shape differences between clades were significant and  
282 accounted for 8.5% of the shape variation.

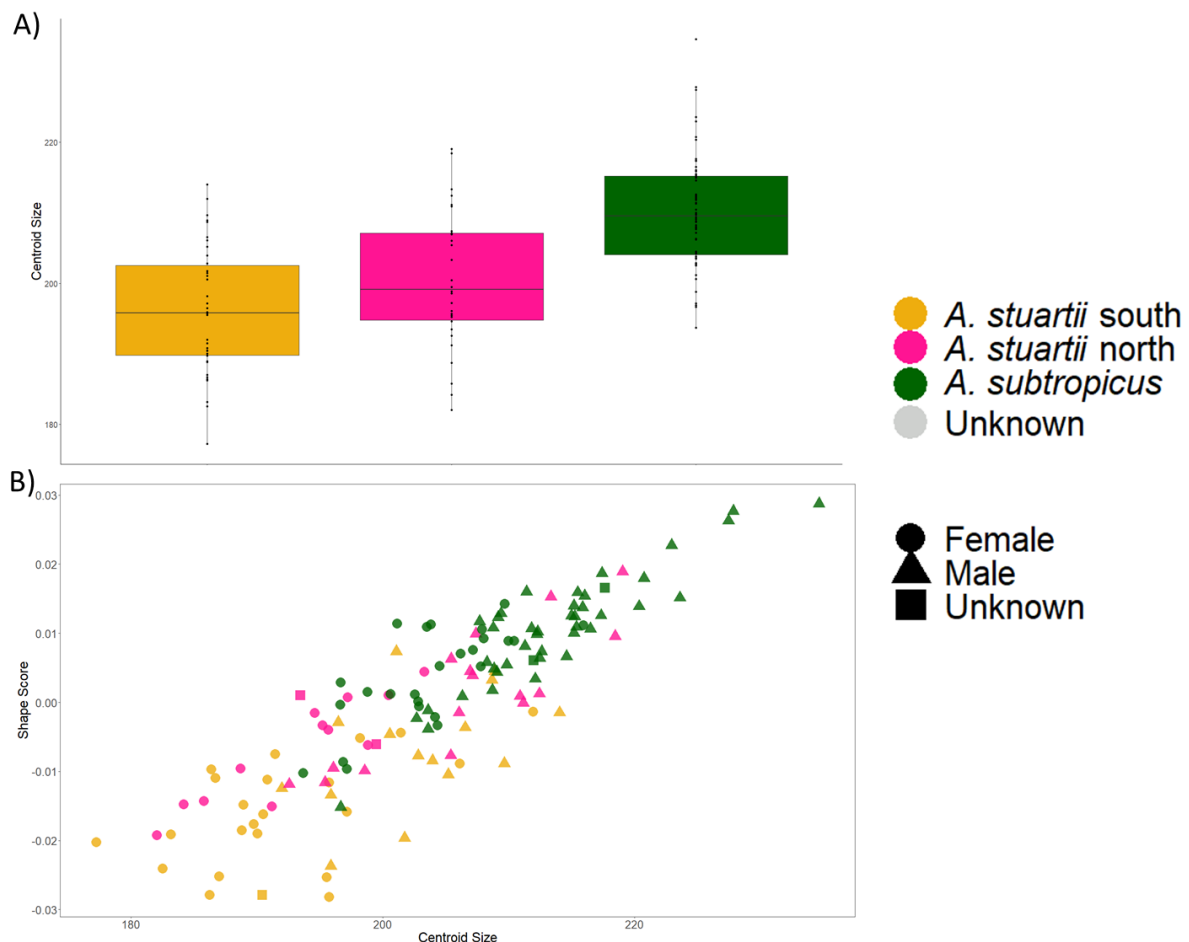

283

284 **Figure 2:** A) Box plot and dot plot of centroid size labelling each clade as per Figure 1.  
285 Centroid size differences were clear only between the larger *A. subtropicus* and the smaller  
286 *A. stuartii* (both mean comparisons between *A. subtropicus* and the two clades of *A. stuartii*  
287 were significant;  $p = 0.003$ ), but not between *A. stuartii* south and *A. stuartii* north ( $p = 0.282$ ).  
288 B) Allometry plot consisting of centroid sizes versus shape scores obtained from the  
289 regression of shape on size (Drake & Klingenberg, 2008).

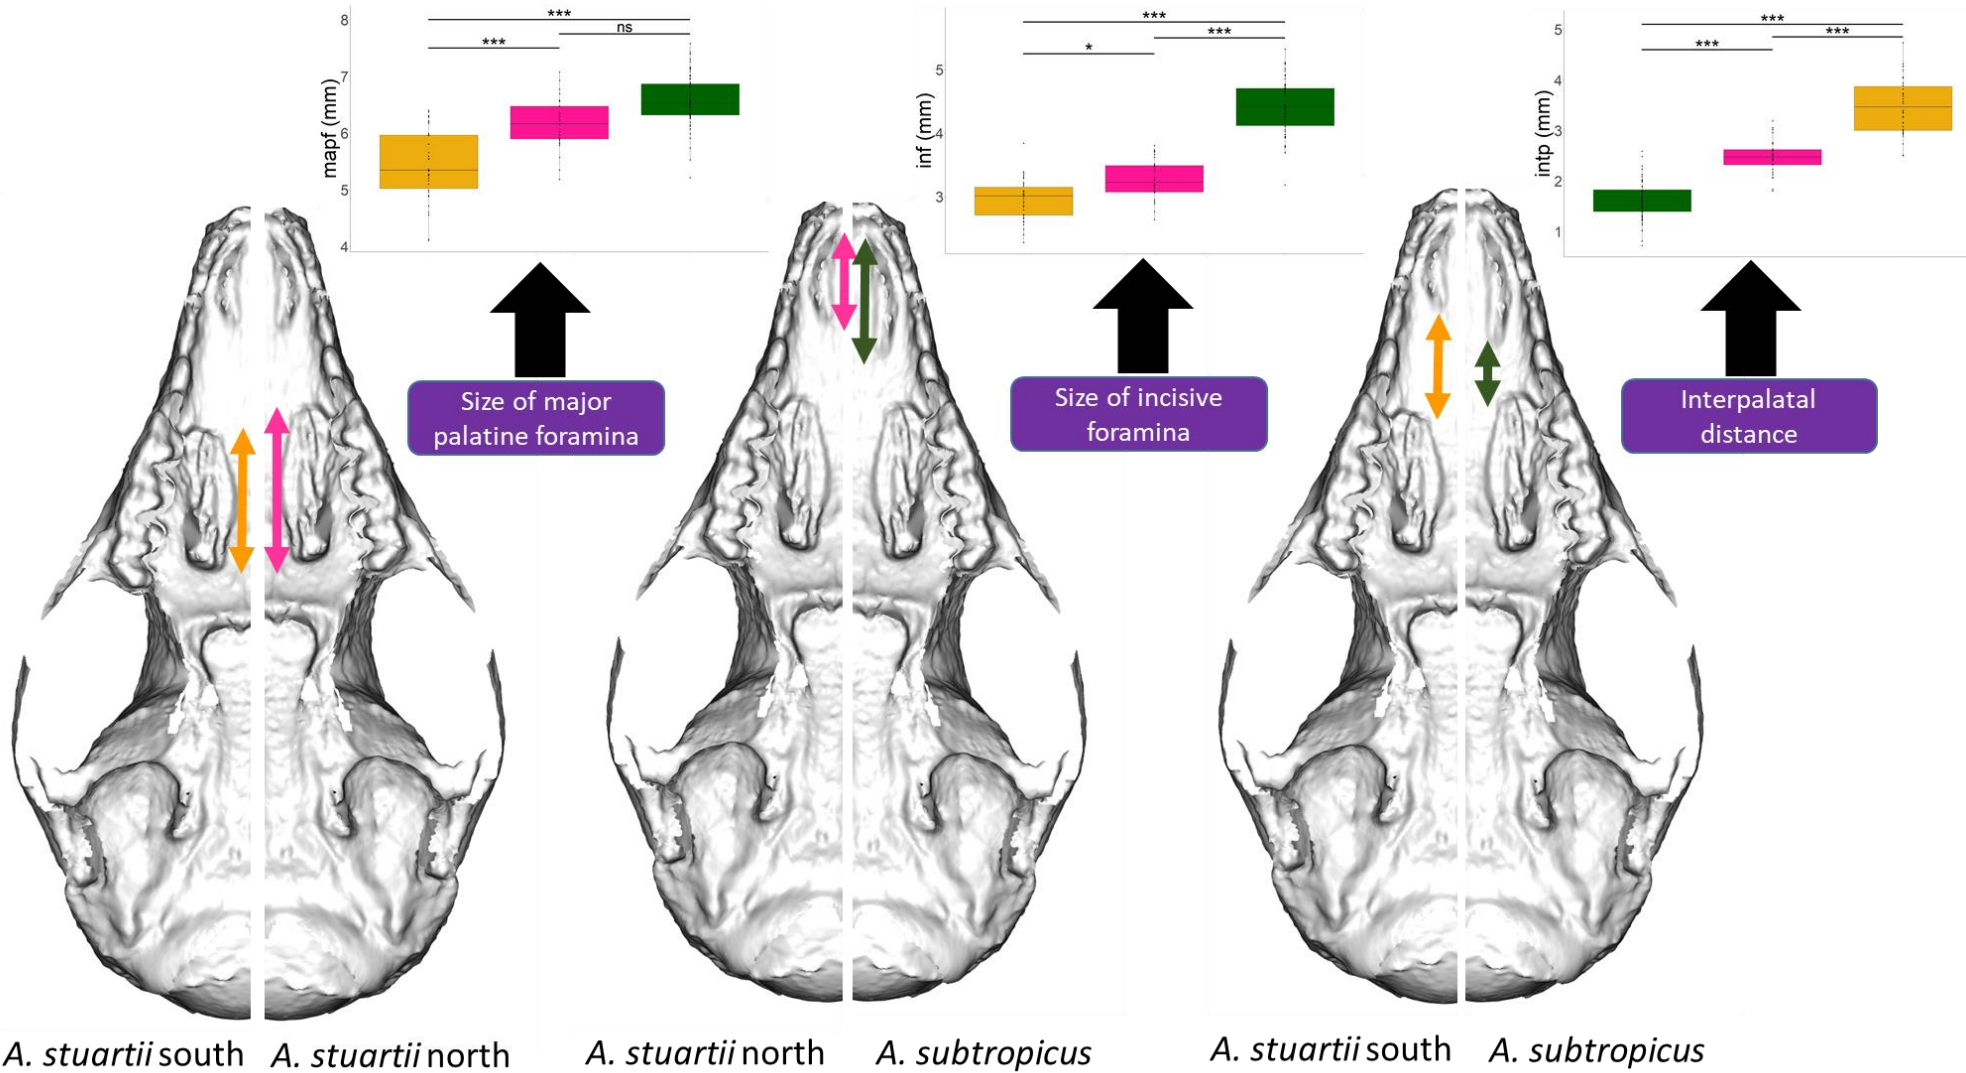

293 **Figure 3:** Pairwise comparisons between mean shapes of each clade (*A. stuartii* south vs *A.*  
294 *stuartii* north,  $p = 0.003$ ; *A. stuartii* north vs *A. subtropicus*,  $p = 0.003$ ; *A. stuartii* south vs *A.*  
295 *subtropicus*,  $p = 0.003$ ; all  $p$ -values were adjusted with following the Bonferroni method). The  
296 3D images are the specimen closest to the overall mean warped correspondingly to the mean  
297 shapes of each clade. Tukey post-hoc analyses of linear measurements after size correction  
298 were performed; significance levels ( $*p < 0.05$ ,  $**p < 0.01$ ,  $***p < 0.001$ ) are shown in the boxplots.  
299 For each comparison, we label the best differentiator diagnostic; i.e., the size of the major  
300 palatine foramina (mapf) for differentiating *A. stuartii* south and *A. stuartii* north, the size of the  
301 incisive foramina (inf) for differentiating *A. stuartii* north and *A. subtropicus*, and the interpalatal  
302 distance (intp) for differentiating between the three clades. Clades are consistently labelled as  
303 per Figure 1.

304

### 305 ***Inter- and intra-group shape variation***

306 The first two principal components represented 28.23 % of the total shape variation (PC1 =  
307 19.68%; PC2 = 8.55%) (Supplementary Figure 2). We found clear shape differences between  
308 clades ( $R^2 = 0.143$ ;  $F_{1, 127} = 11.082$ ;  $p = 0.001$ ). Pairwise comparisons showed that the three  
309 clades clearly differed in shape from each other (all three pairwise comparisons between  
310 means:  $p = 0.001$ ) (also see Figure 3). *Antechinus subtropicus* had larger major palatine  
311 foramina and larger incisive foramina, thus with a smaller interpalatal distance compared to  
312 both *A. stuartii* lineages. *Antechinus stuartii* north had larger major palatine foramina than *A.*  
313 *stuartii* south and smaller incisive foramina than *A. subtropicus* (similar to *A. stuartii* south).  
314 *Antechinus stuartii* south had smaller major palatine foramina than *A. stuartii* north and *A.*  
315 *subtropicus*. We also observed a slight difference of molar row length, larger in *A. stuartii* south  
316 when compared to *A. stuartii* north and *A. subtropicus*. We found no clear morphological  
317 disparity (Procrustes variance) differences between lineages (*A. stuartii* south vs *A. stuartii*  
318 north,  $p = 0.712$ ; *A. stuartii* north vs *A. subtropicus*,  $p = 0.93$ ; *A. stuartii* south vs *A. subtropicus*,  
319  $p = 0.734$ ).

320 Heat maps of landmark displacements between clade mean shapes revealed a striking  
321 dominance of just a few landmarks differentiating them. These were the most anterior point of  
322 the major palatine foramen and the most posterior point of the incisive foramen  
323 (Supplementary Figure 3). We therefore deemed the most distinguishable character between  
324 the three lineages to be the distance between the major palatine and incisive foramen (the

325 interpalatal distance – Fig. 3). We measured this distance, averaged both sides for each  
326 specimen and determined the distance ranges between these two landmarks for each lineage  
327 (Figure 3). All three lineages were clearly different in this character between each other ( $p <$   
328  $0.001$ ). Post hoc Tukey’s multiple comparisons between clade means of three linear distances  
329 involving the most variable landmarks revealed linear measurements with potential for  
330 distinguishing clades (see boxplots of Figure 3). The size of the major palatine foramina  
331 differentiated *A. stuartii* south vs *A. stuartii* north ( $p < 0.001$ ) and *A. stuartii* south vs *A.*  
332 *subtropicus* ( $p < 0.001$ ) but did not differentiate *A. stuartii* north vs *A. subtropicus* ( $p = 0.678$ ).  
333 The size of the incisive foramina differentiated *A. stuartii* south vs *A. subtropicus* ( $p < 0.001$ ),  
334 *A. stuartii* north vs *A. subtropicus* ( $p < 0.001$ ) and *A. stuartii* south vs *A. stuartii* north ( $p =$   
335  $0.0228$ ). The interpalatal distance differentiated *A. stuartii* south vs *A. subtropicus* ( $p < 0.001$ ),  
336 *A. stuartii* north vs *A. subtropicus* ( $p < 0.001$ ) and *A. stuartii* south vs *A. stuartii* north ( $p <$   
337  $0.001$ ).

### 338 ***Ecomorphological characterization***

339 The geographic effect on shape was significant in the *A. stuartii* - *A. subtropicus* species  
340 complex (refer to Table 2 for significance levels and effect sizes). Latitude and longitude were  
341 significantly contributing factors to both shape and size variation (see Table 2). However, the  
342 geographic variation is confounded with the geographic distribution of clades along the east  
343 coast: within-clade geographic analyses did not show clear effects latitudinally nor  
344 longitudinally on size and shape (Table 2). Only members of *A. stuartii* south showed  
345 significant geographic variation (latitude and longitude) in shape, but they were weakly related  
346 (Table 2).

347 We partitioned the contribution of geography, size and climate (precipitation + precipitation  
348 seasonality + temperature + temperature seasonality) to the varpart model (Figure 4). The full



349 **Table 2:** Analyses of Variance on geographic sources of size and shape variation of the entire *A. stuartii* - *A. subtropicus* species complex and  
 350 within each clade.

| RESPONSE VARIABLE | PREDICTOR VARIABLE          | QUESTION                                             | SS                                         | R <sup>2</sup>                             | F                                          | Pr (>F)                                    | INTERPRETATION                                                          |
|-------------------|-----------------------------|------------------------------------------------------|--------------------------------------------|--------------------------------------------|--------------------------------------------|--------------------------------------------|-------------------------------------------------------------------------|
| Size              | Latitude                    | Is latitude covarying with size in this dataset?     | 3735.5                                     | 0.195                                      | 40.29                                      | 0.001                                      | Clear effect.                                                           |
|                   | Latitude within each clade  | Is latitude covarying with size within each clade?   | South: 104.32<br>North: 303.04<br>Sub: 4.7 | South: 0.035<br>North: 0.111<br>Sub: 0.001 | South: 1.311<br>North: 1.08<br>Sub: 0.073  | South: 0.261<br>North: 0.061<br>Sub: 0.813 | No clear effect.                                                        |
|                   | Longitude                   | Is longitude covarying with size in this dataset?    | 3428.9                                     | 0.179                                      | 36.261                                     | 0.001                                      | Clear effect.                                                           |
|                   | Longitude within each clade | Is longitude covarying with size within each clade?  | South: 21.16<br>North: 485.53<br>Sub: 31   | South: 0.007<br>North: 0.178<br>Sub: 0.007 | South: 0.258<br>North: 6.07<br>Sub: 0.478  | South: 0.629<br>North: 0.027<br>Sub: 0.461 | No clear effect. North might have a biased sample.                      |
| Shape             | Latitude                    | Is latitude covarying with shape in this dataset?    | 0.014                                      | 0.093                                      | 17.054                                     | 0.001                                      | Clear effect                                                            |
|                   | Latitude within each clade  | Is latitude covarying with shape within each clade?  | South: 0.002<br>North: 0.001<br>Sub: 0.001 | South: 0.07<br>North: 0.052<br>Sub: 0.025  | South: 2.705<br>North: 1.543<br>Sub: 1.667 | South: 0.001<br>North: 0.058<br>Sub: 0.039 | Only south stuartii is varying latitudinally in shape with low effect.  |
|                   | Longitude                   | Is longitude covarying with shape in this dataset?   | 0.012                                      | 0.081                                      | 14.645                                     | 0.001                                      | Clear effect                                                            |
|                   | Longitude within each clade | Is longitude covarying with shape within each clade? | South: 0.002<br>North: 0.001<br>Sub: 0.001 | South: 0.066<br>North: 0.051<br>Sub: 0.022 | South: 2.554<br>North: 1.494<br>Sub: 1.461 | South: 0.003<br>North: 0.09<br>Sub: 0.117  | Only south stuartii is varying longitudinally in shape with low effect. |

351

352 **Table 3:** ANOVA on climatic predictors of size variation and Procrustes ANOVA on climatic predictors of shape variation.

|                           | d. f. | Size   |                |       |        | Shape |                |        |        |
|---------------------------|-------|--------|----------------|-------|--------|-------|----------------|--------|--------|
|                           |       | SS     | R <sup>2</sup> | F     | Pr(>F) | SS    | R <sup>2</sup> | F      | Pr(>F) |
| Precipitation             | 1     | 731    | 0.032          | 6.596 | 0.011  | 0.002 | 0.013          | 2.135  | 0.012  |
| Precipitation seasonality | 1     | 3193.6 | 0.162          | 33.27 | <0.001 | 0.012 | 0.08           | 14.521 | 0.001  |
| Temperature               | 1     | 4550.7 | 0.233          | 51.83 | <0.001 | 0.011 | 0.075          | 13.5   | 0.001  |
| Temperature seasonality   | 1     | 1906.7 | 0.094          | 18.38 | <0.001 | 0.002 | 0.016          | 2.69   | 0.004  |
| Elevation                 | 1     | 390.2  | 0.015          | 3.457 | 0.065  | 0.001 | 0.006          | 1.048  | 0.382  |

353

354 model showed a significant effect on shape variation ( $F_{15,152} = 3.981$ , adjusted  $R^2 = 0.211$ ,  $p =$   
355  $0.001$ ). Pure geographic distances contributed 3% on shape variation ( $F_{10,152} = 1.593$ , adjusted  
356  $R^2 = 0.029$ ,  $p = 0.001$ ). Size alone explained 8% of the variance in the varpart model ( $F_{1,152} =$   
357  $17.025$ , adjusted  $R^2 = 0.083$ ,  $p = 0.001$ ). Climatic variables alone only contributed to less than  
358 1% of the variance ( $F_{4,152} = 1.375$ , adjusted  $R^2 = 0.008$ ); however, when considered jointly  
359 with geography, climate and geography explained 9% of the shape variation in the model  
360 ( $F_{4,163} = 5.211$ , adjusted  $R^2 = 0.092$ ,  $p = 0.001$ ). Of the four environmental variables considered  
361 in the model, precipitation seasonality and temperature jointly contributed the most to shape  
362 variation (Figure 4 and Table 3).

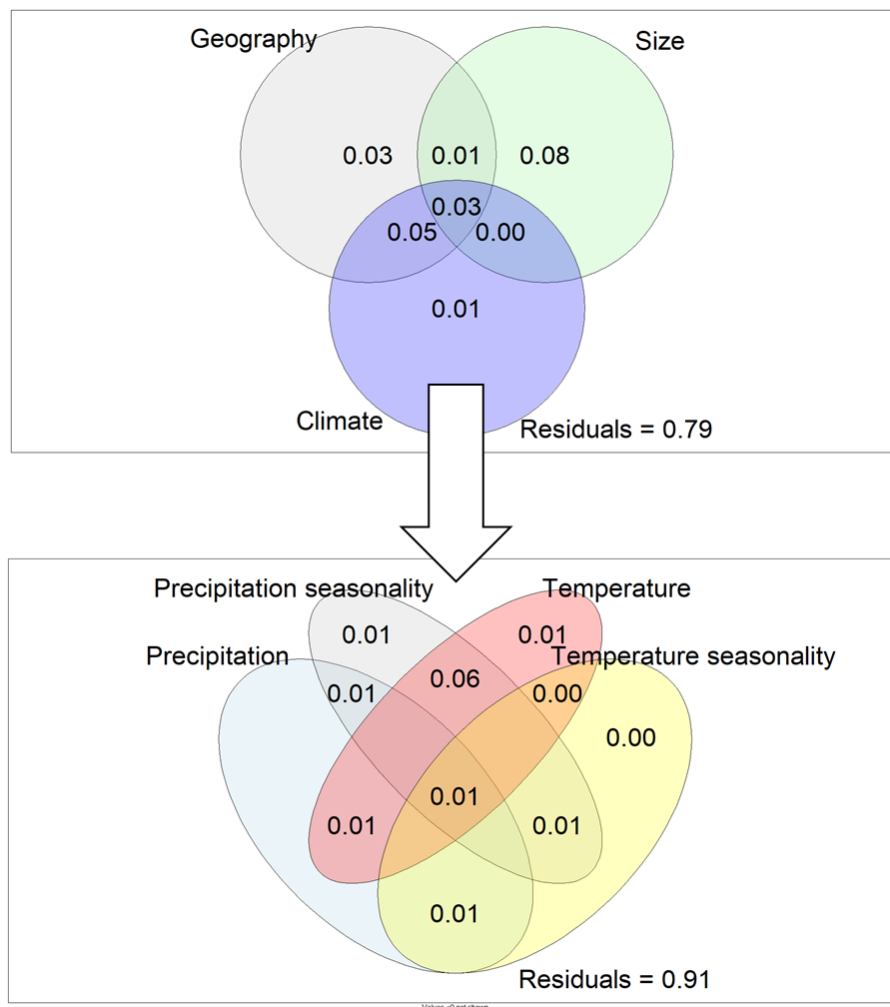

363

364 **Figure 4:** Venn diagrams illustrating variation partitioning analyses. Each individual fraction  
365 for each factor contributing to the model is shown in every set. Circle sizes and white space  
366 out of the circles representing the unexplained variation are schematic and not to scale.

367 **IV. Discussion**

368 *Antechinus* species have undergone multiple taxonomic revisions, with recent genetic  
369 data suggesting substantially higher biodiversity within the genus than previously expected.  
370 Here, we corroborated the genetic differences between *A. stuartii* north and *A. stuartii* south  
371 observing clear morphological differences in the major palatine foramina. Thus, we have  
372 provided a cranial morphological differentiator in support of Mutton et al.'s (2019) suggestion  
373 that *A. stuartii* south and *A. stuartii* north should be reclassified as separate species, within  
374 the scope of the phylogenetic species concept (Nixon & Wheeler, 1990). We also corroborated  
375 shape differences between *A. subtropicus* and *A. stuartii* and provided an easy-to-follow  
376 morphological differentiation protocol for skulls of the three lineages. Additionally, among the  
377 environmental variables considered, precipitation seasonality and temperature were the most  
378 important factors for shaping the skull in the *A. stuartii* - *A. subtropicus* complex. This renders  
379 the species group of particular conservation concern because it is located on the east coast  
380 of Australia, a zone increasingly impacted by climate change (Di Virgilio *et al.*, 2019; Dowdy  
381 *et al.*, 2019; Kirono *et al.*, 2020), which is expected to cause variation in precipitation  
382 seasonality, temperature and fire weather. Importantly, the distributional ranges of *A. stuartii*  
383 south and *A. stuartii* north fall directly within the burn zone of 2019-2020 mega-fires, and the  
384 results of the present study add support to a case for the separate management of these taxa.

385 Differences in palatal vacuity size and molar row length, which we found as important  
386 differentiators in our investigation, are widely recognized as diagnostically useful for species  
387 identification in various marsupials. For example, the size of the palatal vacuities differentiate  
388 species of potoroids, e.g., *Bettongia* (McDowell *et al.*, 2015) and peramelids, e.g.,  
389 *Microperoryctes* (Groves & Flannery, 1990). Dasyurid species have also been diagnosed in  
390 consideration of palatal vacuity size, e.g., *Sminthopsis* (Archer, 1981; Kemper *et al.*, 2011);  
391 and more specifically, several species of *Antechinus* (Van Dyck, 1982; Dickman *et al.*, 1998;  
392 Baker *et al.*, 2012, 2014). We also add a new differentiating skull trait of molar row length for  
393 the clades studied here, which is possibly linked to allometry. This taxonomic differentiator has

394 been found for other antechinus species varying in absolute size (Baker *et al.*, 2012, 2013;  
395 Baker & Van Dyck, 2013b). Molar row length has also been found to separate diverse  
396 mammals such as rodents (Anderson & Yates, 2000; Christoff *et al.*, 2000; Gonçalves,  
397 Almeida, & Bonvicino, 2005; Boroni *et al.*, 2017), shrews (Balčiauskienė, Juškaitis, &  
398 Mažeikytė, 2002), bats (Bogdanowicz, 1990), wombats (Black, 2007) and didelphids (Voss,  
399 Lunde, & Jansa, 2005).

400 Our geographic analyses suggest that the latitudinal shape variation observed across  
401 the entire dataset is likely driven by morphological differences between the taxa; however, this  
402 latitudinal shape variation is not strongly associated with shape within each taxon (see Table  
403 2). This suggests that clinal variation does co-vary with the shape differentiation between the  
404 three clades and the clinal variation we observe in the whole dataset is a result of, but not  
405 notably influenced by, the clinal distribution of the three taxa. This appearance of a clinal effect  
406 would be even stronger under the old taxonomic combination of *A. stuartii* south and north as  
407 one species (rather than *A. stuartii* north being sister taxa of *A. subtropicus*), which may have  
408 prompted previous suggestions that the variation between species of *Antechinus* may be  
409 driven clinally (Van Dyck & Crowther, 2000) (i.e., climatically/geographically). However, the  
410 nature of the variation within the genus and its relation to latitude should be investigated in a  
411 broader sample of antechinus species, particularly since there have been suggestions that *A.*  
412 *subtropicus* is more similar morphologically to the less genetically closely related *A. agilis* than  
413 it is to *A. stuartii* (Dickman *et al.*, 1998; Van Dyck & Crowther, 2000; Crowther, 2002; Crowther,  
414 Sumner, & Dickman, 2003). Regardless, finding little or no clinal shape variation *within* each  
415 clade (also suggested for the whole of *A. stuartii* by (Crowther *et al.*, 2003)) suggests that  
416 speciation-related differences in morphology are independent of within-species variation in  
417 these antechinus taxa (a pattern also found in wombats (Weisbecker *et al.*, 2019)).

418 Our results add some insights on the putative processes behind the speciation event  
419 in the young clades of the *A. stuartii* – *A. subtropicus* complex. In 1981, Archer argued that  
420 the species of *Sminthopsis* located in inland arid areas had larger palatal vacuities and linked

421 the size of the vacuities to aridity. We also found differences in vacuity sizes with smaller major  
422 palatine foramina in the southern clade of *A. stuartii* relative to the northern clade and *A.*  
423 *subtropicus*. Although we did not find a strong influence of precipitation or aridity with shape  
424 variation in this species complex, shape variation was strongly associated with temperature  
425 and precipitation seasonality variation. In particular, rainfall seasonality is associated with food  
426 abundance predictability (Kishimoto- Yamada & Itioka, 2015), which appears tied to variation  
427 in breeding times observed in antechinus species and is hypothesized to have driven the  
428 evolution of semelparity in these dasyurids (Fisher *et al.*, 2013). This environmental factor may  
429 have also influenced reproductive isolation involving morphological differentiation. Intriguingly,  
430 the shape changes associated with precipitation seasonality involve differences in the size of  
431 the palatal vacuities with *A. subtropicus* displaying larger incisive and major palatine foramina  
432 than *A. stuartii*. These vacuities convey access to the vomeronasal organ that plays a major  
433 role in antechinus reproduction (Aland, Gosden, & Bradley, 2016).

434 The difference in molar row length between *A. stuartii* south relative to *A. stuartii* north  
435 is noteworthy because it is reminiscent of a well-known effect where carnassial tooth length  
436 differentiates carnivoran species living in sympatry. Garcia-Navas *et al.* (2020) suggested that,  
437 due to the mostly insectivorous nature and lack of carnassial teeth in dasyurids, such an effect  
438 is not expected; however, the molar row of dasyurids has in the past been argued to act as a  
439 single contiguous shearing blade (Werdelin, 1986, 1987; Smits & Evans, 2012). It is therefore  
440 possible that the difference in molar row length we observe is related to an effect of dietary  
441 niche partitioning, similar to carnivorans. However, because the molar row length differences  
442 are tied to allometry, it is also possible that this pattern is influenced by a more general effect  
443 of allometric scaling, such as the distinction of molar row length observed between differently  
444 sized *A. argentus*, *A. flavipes* and *A. mysticus* (Baker *et al.*, 2012, 2013; Baker & Van Dyck,  
445 2013b).

446 Not all of our findings based on geometric morphometrics are consistent with previous  
447 morphological observations based on the analysis of skull proportions. For example, the

448 differentiation of *A. stuartii* south with *A. subtropicus* according to molar row length was not  
449 observed by Van Dyck & Crowther (2000). Intriguingly also, we did not observe a previously  
450 suggested morphological distinction – a longer and narrower rostrum – between *A.*  
451 *subtropicus* and *A. stuartii* (Van Dyck & Crowther, 2000). It is possible that the latter  
452 discrepancy is mainly due to pure size differences (i.e., non-shape differences) between these  
453 two clades, which may be reflected differently in the different analytical approaches.  
454 Specifically, the moderate size-related (allometric) shape changes we observe with geometric  
455 morphometrics might not be regarded as allometric in linear measurement studies. Traditional  
456 morphometric studies focus on maximal lengths and widths, and use ratios as a descriptor for  
457 shape. By comparison, in geometric morphometrics, the descriptor of shape includes the  
458 relative positions and distances of all landmarks, and size is removed from the equation after  
459 Procrustes superimposition. This can cause two types of discrepancy in the analysis of relative  
460 size: first, when allometry is analysed in traditional methods, it generally relies on non-scaled  
461 or log-scaled measures, whereas when allometry is analysed in geometric morphometrics, the  
462 factors taken into account are the calculated centroid size and a scaled abstract shape  
463 (Mitteroecker & Gunz, 2009). Thus, it is possible that rostral length measurements may be  
464 heavily influenced by differences in size between species, rendering the diagnostic less  
465 suitable for differentiating similarly sized individuals of these clades. A potential second issue  
466 is that geometric morphometric landmarking protocols of the mammalian cranium generally  
467 rely on homologous points such as suture intersections (type I landmarks), rather than  
468 frequently employed taxonomic measures of maximum and minimum widths or lengths. Such  
469 “extreme points” of shape may therefore be less emphasised by the landmarking protocol. In  
470 such cases, the chief consideration should be whether the location of extreme-point  
471 measurements relative to the skull may matter.

472 In this study, we have demonstrated the versatility of geometric morphometric  
473 research, providing taxonomic discernment in otherwise morphologically cryptic species and  
474 inferring biological processes by identifying associations between morphological

475 differentiation, and geographic and environmental factors. On the taxonomic aspect, the  
476 resolution of these small cryptic taxa by 3D shape analyses highlights the importance of the  
477 method in systematic studies. In the future, these mammal taxa may see their geographic  
478 ranges reduced by an elevation to species rank and, unfortunately, their populations diminish  
479 due to a fatal coincidence with fire line zones along Eastern Australia.

480

## 481 **V. ACKNOWLEDGEMENTS**

482 We thank all museum collections who granted us access to scan their specimens: Heather  
483 Janetzki (Queensland Museum), Sandy Ingleby (Australian Museum), and Christopher Wilson  
484 and Leo Joseph (Australian National Wildlife Collection from the Commonwealth Scientific and  
485 Industrial Research Organisation). P. V. was supported by a University of Queensland  
486 Research Training Tuition Scholarship and a University of Queensland Research Higher  
487 Degree Living Stipend Scholarship. V. W. was supported by the Future Fellowship  
488 FT180100634; and V. W. and M. J. P. were funded by the Australian Research Council  
489 Discovery Project DP170103227. We also thank Bastien Mennecart and one anonymous  
490 reviewer for their generous comments and helping improve the manuscript.

491 **VI. AUTHOR CONTRIBUTIONS:** P. V. and V. W. conceived the ideas; P. V. collected the  
492 data; P. V. and V. W. analysed the data with input from A. M. B., S. P. B. and M. J. P.;  
493 and P. V. and V. W. led the writing with input from A. M. B., S. P. B. and M. J. P.

494

## 495 **VII. DATA AVAILABILITY STATEMENT**

496 Data and R code are publicly available in [GitHub](#). 3D models can also be publicly accessed  
497 through Morphosource.

498

## 499 **VIII. CONFLICT OF INTEREST**



500 The authors declare no conflict of interest.

501

502 **IX. References**

503 Adams DC, Otárola-Castillo E. 2013. geomorph: an R package for the collection and  
504 analysis of geometric morphometric shape data. *Methods in Ecology and Evolution* 4: 393–  
505 399.

506 Adams DC, Rohlf FJ, Slice DE. 2013. A field comes of age: geometric morphometrics in the  
507 21st century. *Hystrix, the Italian Journal of Mammalogy* 24.

508 Aland RC, Gosden E, Bradley AJ. 2016. Seasonal morphometry of the vomeronasal organ in  
509 the marsupial mouse, *Antechinus subtropicus*. *Journal of Morphology* 277: 1517–1530.

510 Anderson S, Yates TL. 2000. A New Genus and Species of Phyllotine Rodent from Bolivia.  
511 *Journal of Mammalogy* 81: 18–36.

512 Archer M. 1981. Systematic revision of the marsupial dasyurid genus *Sminthopsis* Thomas.  
513 Bulletin of the AMNH ; v. 168, article 2: 65-217.

514 Baker AM, Dickman C. 2018. *Secret lives of carnivorous marsupials*. CSIRO PUBLISHING,  
515 Clayton, Victoria.

516 Baker AM, Mutton TY, Hines H. 2013. A new dasyurid marsupial from Kroombit Tops, south-  
517 east Queensland, Australia: the Silver-headed antechinus, *Antechinus argentus sp. nov.*  
518 (Marsupialia: Dasyuridae). *Zootaxa* 3746: 201–239.

519 Baker AM, Mutton TY, Hines H, Van Dyck S. 2014. The Black-tailed antechinus, *Antechinus*  
520 *arktos sp. nov.*: a new species of carnivorous marsupial from montane regions of the Tweed  
521 Volcano caldera, eastern Australia. *Zootaxa* 3765: 101–33.

- 522 Baker AM, Mutton TY, Mason E, Gray EL. 2015. A taxonomic assessment of the Australian  
523 dusky antechinus complex: a new species, the Tasman Peninsula dusky antechinus  
524 (*Antechinus vandycki* sp. nov.) and an elevation to species of the mainland dusky  
525 antechinus (*Antechinus swainsonii mimetes* (Thomas)). *Memoirs of the Queensland*  
526 *Museum–Nature* 59: 75–126.
- 527 Baker AM, Mutton TY, Van Dyck S. 2012. A new dasyurid marsupial from eastern  
528 Queensland, Australia: the Buff-footed antechinus, *Antechinus mysticus* sp. nov.  
529 (Marsupialia: Dasyuridae). *Zootaxa* 3515: 1–37.
- 530 Baker AM, Van Dyck S. 2013a. Taxonomy and redescription of the Fawn antechinus,  
531 *Antechinus bellus* (Thomas) (Marsupialia: Dasyuridae). *Zootaxa* 3613: 201–228.
- 532 Baker AM, Van Dyck S. 2013b. Taxonomy and redescription of the Yellow-footed antechinus  
533 , *Antechinus flavipes* (Waterhouse) (Marsupialia: Dasyuridae). *Zootaxa* 3649: 1–62.
- 534 Baker AM, Van Dyck S. 2013c. Taxonomy and redescription of the Atherton Antechinus,  
535 *Antechinus godmani* (Thomas) (Marsupialia: Dasyuridae). *Zootaxa* 3670: 401–439.
- 536 Baker AM, Van Dyck S. 2015. Taxonomy and redescription of the swamp antechinus,  
537 *Antechinus minimus* (E. Geoffroy) (Marsupialia: Dasyuridae). *Memoirs of the Queensland*  
538 *Museum - Nature* 59: 127–170.
- 539 Balčiauskienė L, Juškaitis R, Mažeikytė R. 2002. Identification of Shrews and Rodents from  
540 Skull Remains according to the Length of a Tooth Row. *Acta Zoologica Lituanica* 12: 353–  
541 361.
- 542 Bickford D, Lohman DJ, Sodhi NS, Ng PKL, Meier R, Winker K, Ingram KK, Das I. 2007.  
543 Cryptic species as a window on diversity and conservation. *Trends in Ecology & Evolution*  
544 22: 148–155.

- 545 Black K. 2007. Maradidae: a new family of vombatomorphian marsupial from the late  
546 Oligocene of Riversleigh, northwestern Queensland. *Alcheringa: An Australasian Journal of*  
547 *Palaeontology* 31: 17–32.
- 548 Bogdanowicz W. 1990. Geographic Variation and Taxonomy of Daubenton's Bat, *Myotis*  
549 *daubentoni* in Europe. *Journal of Mammalogy* 71: 205–218.
- 550 Bookstein FL. 1997. Landmark methods for forms without landmarks: morphometrics of  
551 group differences in outline shape. *Medical Image Analysis* 1: 225–243.
- 552 Borcard D, Legendre P. 2002. All-scale spatial analysis of ecological data by means of  
553 principal coordinates of neighbour matrices. *Ecological Modelling* 153: 51–68.
- 554 Boroni NL, Lobo LS, Romano PSR, Lessa G, Boroni NL, Lobo LS, Romano PSR, Lessa G.  
555 2017. Taxonomic identification using geometric morphometric approach and limited data: an  
556 example using the upper molars of two sympatric species of *Calomys* (Cricetidae: Rodentia).  
557 *Zoologia (Curitiba)* 34.
- 558 Bowman DMJS, Kolden CA, Abatzoglou JT, Johnston FH, van der Werf GR, Flannigan M.  
559 2020. Vegetation fires in the Anthropocene. *Nature Reviews Earth & Environment* 1: 500–  
560 515.
- 561 Bryant LM, Fuller SJ. 2014. Pleistocene climate fluctuations influence phylogeographical  
562 patterns in *Melomys cervinipes* across the mesic forests of eastern Australia. *Journal of*  
563 *Biogeography* 41: 1923–1935.
- 564 Bryant LM, Krosch MN. 2016. Lines in the land: a review of evidence for eastern Australia's  
565 major biogeographical barriers to closed forest taxa. *Biological Journal of the Linnean*  
566 *Society* 119: 238–264.

- 567 Chaplin K, Sumner J, Hipsley CA, Melville J. 2020. An Integrative Approach Using  
568 Phylogenomics and High-Resolution X-Ray Computed Tomography for Species Delimitation  
569 in Cryptic Taxa. *Systematic Biology* 69: 294–307.
- 570 Chapple DG, Chapple SNJ, Thompson MB. 2011a. Biogeographic barriers in south-eastern  
571 Australia drive phylogeographic divergence in the garden skink, *Lampropholis guichenoti*.  
572 *Journal of Biogeography* 38: 1761–1775.
- 573 Chapple DG, Hoskin CJ, Chapple SN, Thompson MB. 2011b. Phylogeographic divergence  
574 in the widespread delicate skink (*Lampropholis delicata*) corresponds to dry habitat barriers  
575 in eastern Australia. *BMC Evolutionary Biology* 11: 191.
- 576 Christoff AU, Fagundes V, Sbalqueiro IJ, Mattevi MS, Yonenaga-Yassuda Y. 2000.  
577 Description of a New Species of *Akodon* (Rodentia: Sigmodontinae) from Southern Brazil.  
578 *Journal of Mammalogy* 81: 838–851.
- 579 Colgan DJ, O’Meally D, Sadlier RA. 2010. Phylogeographic patterns in reptiles on the New  
580 England Tablelands at the south-western boundary of the McPherson Macleay Overlap.  
581 *Australian Journal of Zoology* 57: 317–328.
- 582 Crandall KA, Bininda-Emonds ORP, Mace GM, Wayne RK. 2000. Considering evolutionary  
583 processes in conservation biology. *Trends in Ecology & Evolution* 15: 290–295.
- 584 Crowther MS. 2002. Morphological variation within *Antechinus agilis* and *Antechinus stuartii*  
585 (Marsupialia : Dasyuridae). *Australian Journal of Zoology* 50: 339–356.
- 586 Crowther MS, Sumner J, Dickman CR. 2003. Speciation of *Antechinus stuartii* and *A.*  
587 *subtropicus* (Marsupialia : Dasyuridae) in eastern Australia: molecular and morphological  
588 evidence. *Australian Journal of Zoology* 51: 443.

- 589 Crowther MS, Tulloch AI, Letnic M, Greenville AC, Dickman CR. 2018. Interactions between  
590 wildfire and drought drive population responses of mammals in coastal woodlands. *Journal*  
591 *of Mammalogy* 99: 416–427.
- 592 Di Virgilio G, Evans JP, Blake SAP, Armstrong M, Dowdy AJ, Sharples J, McRae R. 2019.  
593 Climate Change Increases the Potential for Extreme Wildfires. *Geophysical Research*  
594 *Letters* 46: 8517–8526.
- 595 Dickman CR, Parnaby HE, Crowther MS, King DH. 1998. *Antechinus agilis* (Marsupialia :  
596 Dasyuridae), a new species from the *A. stuartii* complex in south-eastern Australia.  
597 *Australian Journal of Zoology* 46: 1–26.
- 598 Dowdy AJ, Ye H, Pepler A, Thatcher M, Osbrough SL, Evans JP, Di Virgilio G, McCarthy N.  
599 2019. Future changes in extreme weather and pyroconvection risk factors for Australian  
600 wildfires. *Scientific Reports* 9: 10073.
- 601 Dubois A. 2003. The relationships between taxonomy and conservation biology  
602 in the century of extinctions. *Comptes Rendus Biologies* 326: 9–21.
- 603 Firth RSC, Brook BW, Woinarski JCZ, Fordham DA. 2010. Decline and likely extinction of a  
604 northern Australian native rodent, the Brush-tailed Rabbit-rat *Conilurus penicillatus*.  
605 *Biological Conservation* 143: 1193–1201.
- 606 Fisher DO, Dickman CR, Jones ME, Blomberg SP. 2013. Sperm competition drives the  
607 evolution of suicidal reproduction in mammals. *Proceedings of the National Academy of*  
608 *Sciences* 110: 17910–17914.
- 609 Frankham GJ, Handasyde KA, Eldridge MDB. 2012. Novel insights into the phylogenetic  
610 relationships of the endangered marsupial genus *Potorous*. *Molecular Phylogenetics and*  
611 *Evolution* 64: 592–602.

- 612 Fraser DJ, Bernatchez L. 2001. Adaptive evolutionary conservation: towards a unified  
613 concept for defining conservation units. *Molecular Ecology* 10: 2741–2752.
- 614 García-Navas V, Kear BP, Westerman M. 2020. The geography of speciation in dasyurid  
615 marsupials. *Journal of Biogeography* 47: 2042–2053.
- 616 Geyle HM, Woinarski JCZ, Baker GB, Dickman CR, Dutson G, Fisher DO, Ford H,  
617 Holdsworth M, Jones ME, Kutt A, Legge S, Leiper I, Loyn R, Murphy BP, Menkhorst P,  
618 Reside AE, Ritchie EG, Roberts FE, Tingley R, Garnett ST. 2018. Quantifying extinction risk  
619 and forecasting the number of impending Australian bird and mammal extinctions. *Pacific*  
620 *Conservation Biology* 24: 157–167.
- 621 Goldingay RL. 2000. Small dasyurid marsupials – are they effective pollinators? *Australian*  
622 *Journal of Zoology* 48: 597–606.
- 623 Goldingay RL, Carthew SM, Whelan RJ. 1991. The Importance of Non-Flying Mammals in  
624 Pollination. *Oikos* 61: 79–87.
- 625 Gonçalves PR, Almeida FC, Bonvicino CR. 2005. A new species of *Wiedomys* (Rodentia:  
626 Sigmodontinae) from Brazilian Cerrad. *Mammalian Biology* 70: 46–60.
- 627 Groves CP, Flannery T. 1990. Revision of the families and genera of bandicoots. *Unknown*  
628 *Journal*: 1–11.
- 629 de Guia APO, Saitoh T. 2007. The gap between the concept and definitions in the  
630 Evolutionarily Significant Unit: the need to integrate neutral genetic variation and adaptive  
631 variation. *Ecological Research* 22: 604–612.
- 632 Guillaume T, Puttick MN, Marcy AE, Weisbecker V. 2020. Shifting spaces: Which disparity or  
633 dissimilarity measurement best summarize occupancy in multidimensional spaces? *Ecology*  
634 *and Evolution* 10: 7261–7275.

- 635   Guillaume T, Weisbecker V. 2019. *landvR: Tools for measuring landmark position variation*.  
636   Zenodo.
- 637   Holleley CE, Dickman CR, Crowther MS, Oldroyd BP. 2006. Size breeds success: multiple  
638   paternity, multivariate selection and male semelparity in a small marsupial, *Antechinus*  
639   *stuartii*. *Molecular Ecology* 15: 3439–3448.
- 640   Jackson S, Groves C. 2015. *Taxonomy of Australian Mammals*. Csiro Publishing.
- 641   James CH, Moritz C. 2000. Intraspecific phylogeography in the sedge frog *Litoria fallax*  
642   (Hylidae) indicates pre-Pleistocene vicariance of an open forest species from eastern  
643   Australia. *Molecular Ecology* 9: 349–358.
- 644   Kemper CM, Cooper SJB, Medlin GC, Adams M, Stemmer D, Saint KM, McDowell MC,  
645   Austin JJ. 2011. Cryptic grey-bellied dunnart (*Sminthopsis griseoventer*) discovered in South  
646   Australia: genetic, morphological and subfossil analyses show the value of collecting  
647   voucher material. *Australian Journal of Zoology* 59: 127.
- 648   Kendall DG. 1989. A survey of the statistical Theory of shape. *Statistical Science* 4: 87–99.
- 649   Kirono DGC, Round V, Heady C, Chiew FHS, Osbrough S. 2020. Drought projections for  
650   Australia: Updated results and analysis of model simulations. *Weather and Climate*  
651   *Extremes* 30: 100280.
- 652   Kishimoto-Yamada K, Itioka T. 2015. How much have we learned about seasonality in  
653   tropical insect abundance since Wolda (1988)? *Entomological Science* 18: 407–419.
- 654   Kraaijeveld-Smit FJL, Ward SJ, Temple-Smith PD. 2003. Paternity success and the direction  
655   of sexual selection in a field population of a semelparous marsupial, *Antechinus agilis*.  
656   *Molecular Ecology* 12: 475–484.

- 657 Lee AK, Cockburn A. 1985. *Evolutionary Ecology of Marsupials*. Cambridge University  
658 Press.
- 659 Legge S, Robinson N, Lindenmayer D, Scheele B, Southwell D, Wintle B. 2018. *Monitoring*  
660 *threatened species and ecological communities*. CSIRO Publishing.
- 661 Letnic M, Tamayo B, Dickman CR. 2005. The Responses of Mammals to La Niña (El Niño  
662 Southern Oscillation)–Associated Rainfall, Predation, and Wildfire in Central Australia.  
663 *Journal of Mammalogy* 86: 689–703.
- 664 Lucky A. 2011. Molecular phylogeny and biogeography of the spider ants, genus  
665 *Leptomymex* Mayr (Hymenoptera: Formicidae). *Molecular Phylogenetics and Evolution* 59:  
666 281–292.
- 667 Marcy AE, Fruciano C, Phillips MJ, Mardon K, Weisbecker V. 2018. Low resolution scans  
668 can provide a sufficiently accurate, cost- and time-effective alternative to high resolution  
669 scans for 3D shape analyses (P Cox, Ed.). *PeerJ* 6: e5032.
- 670 May RM. 1988. How Many Species Are There on Earth? *Science* 241: 1441–1449.
- 671 McDowell MC, Haouchar D, Aplin KP, Bunce M, Baynes A, Prideaux GJ. 2015.  
672 Morphological and molecular evidence supports specific recognition of the recently extinct  
673 *Bettongia anhydra* (Marsupialia: Macropodidae). *Journal of Mammalogy* 96: 287–296.
- 674 McGuigan K, McDonald K, Parris K, Moritz C. 1998. Mitochondrial DNA diversity and  
675 historical biogeography of a wet forest-restricted frog (*Litoria pearsoniana*) from mid-east  
676 Australia. *Molecular Ecology* 7: 175–186.
- 677 Mitteroecker P, Gunz P. 2009. Advances in geometric morphometrics. *Evolutionary Biology*  
678 36: 235–247.



679 Murphy BP, Woolley LA, Geyle HM, Legge SM, Palmer R, Dickman CR, Augusteyn J, Brown  
680 SC, Comer S, Doherty TS, Eager C, Edwards G, Fordham DA, Harley D, McDonald PJ,  
681 McGregor H, Moseby KE, Myers C, Read J, Riley J, Stokeld D, Trewella GJ, Turpin JM,  
682 Woinarski JCZ. 2019. Introduced cats (*Felis catus*) eating a continental fauna: The number  
683 of mammals killed in Australia. *Biological Conservation* 237: 28–40.

684 Mutton TY, Phillips MJ, Fuller SJ, Bryant LM, Baker AM. 2019. Systematics, biogeography  
685 and ancestral state of the Australian marsupial genus *Antechinus* (Dasyuromorphia:  
686 Dasyuridae). *Zoological Journal of the Linnean Society* 186: 553–568.

687 Nixon KC, Wheeler QD. 1990. An Amplification of the Phylogenetic Species Concept.  
688 *Cladistics* 6: 211–223.

689 O'Donnell MS, Ignizio DA. 2012. Bioclimatic predictors for supporting ecological applications  
690 in the conterminous United States. *US Geological Survey Data Series* 691.

691 Oksanen J, Blanchet FG, Friendly M, Kindt R, Legendre P, McGlenn D, Minchin PR, O'Hara  
692 RB, Simpson GL, Solymos P. 2018. vegan: Community ecology package. R package  
693 version 2.5-2. 2018.

694 Pardon LG, Brook BW, Griffiths AD, Braithwaite RW. 2003. Determinants of survival for the  
695 northern brown bandicoot under a landscape-scale fire experiment. *Journal of Animal*  
696 *Ecology* 72: 106–115.

697 Pastro L. 2013. The effects of wildfire on small mammals and lizards in The Simpson Desert,  
698 Central Australia.

699 R Core Team. 2019. R: A language and environment for statistical computing. R Foundation  
700 for Statistical Computing, Vienna, Austria.

701 Radford JQ, Woinarski JCZ, Legge S, Baseler M, Bentley J, Burbidge AA, Bode M, Copley  
702 P, Dexter N, Dickman CR, Gillespie G, Hill B, Johnson CN, Kanowski J, Latch P, Letnic M,

- 703 Manning A, Menkhorst P, Mitchell N, Morris K, Moseby K, Page M, Ringma J. 2018.  
704 Degrees of population-level susceptibility of Australian terrestrial non-volant mammal  
705 species to predation by the introduced red fox (*Vulpes vulpes*) and feral cat (*Felis catus*).  
706 *Wildlife Research* 45: 645–657.
- 707 Rix MG, Harvey MS. 2012. Phylogeny and historical biogeography of ancient assassin  
708 spiders (Araneae: Archaeidae) in the Australian mesic zone: Evidence for Miocene  
709 speciation within Tertiary refugia. *Molecular Phylogenetics and Evolution* 62: 375–396.
- 710 Rohlf FJ, Slice D. 1990. Extensions of the Procrustes method for the optimal superimposition  
711 of landmarks. *Systematic Biology* 39: 40–59.
- 712 Rowe KMC, Rowe KC, Elphinstone MS, Baverstock PR. 2012. Population structure, timing  
713 of divergence and contact between lineages in the endangered Hastings River mouse  
714 (*Pseudomys oralis*). *Australian Journal of Zoology* 59: 186–200.
- 715 Schlager S, Jefferis G, Ian D, Schlager MS. 2019. Package ‘Morpho’.
- 716 Schmidt EJ, Parsons TE, Jamniczky HA, Gitelman J, Trpkov C, Boughner JC, Logan CC,  
717 Sensen CW, Hallgrímsson B. 2010. Micro-computed tomography-based phenotypic  
718 approaches in embryology: procedural artifacts on assessments of embryonic craniofacial  
719 growth and development. *BMC Developmental Biology* 10: 18.
- 720 Smits PD, Evans AR. 2012. Functional constraints on tooth morphology in carnivorous  
721 mammals. *BMC Evolutionary Biology* 12: 146.
- 722 Sumner J, Dickman CR. 1998. Distribution and identity of species in the *Antechinus stuartii* -  
723 *A. flavipes* group (Marsupialia : Dasyuridae) in south-eastern Australia. *Australian Journal of*  
724 *Zoology* 46: 27.

- 725 Ukkola AM, Kauwe MGD, Roderick ML, Abramowitz G, Pitman AJ. 2020. Robust Future  
726 Changes in Meteorological Drought in CMIP6 Projections Despite Uncertainty in  
727 Precipitation. *Geophysical Research Letters* 47: e2020GL087820.
- 728 Van Dyck S. 1982. The status and relationships of the Atherton antechinus, *Antechinus*  
729 *godmani* (Marsupialia: Dasyuridae). *Australian Mammalogy* 5: 195–210.
- 730 Van Dyck S, Crowther MS. 2000. Reassessment of northern representatives of the  
731 *Antechinus stuartii* complex (Marsupialia: Dasyuridae): *A subtropicus* sp. nov. and *A.*  
732 *adustus* new status. *MEMOIRS-QUEENSLAND MUSEUM* 45: 611–635.
- 733 Viacava P, Blomberg SP, Sansalone G, Phillips MJ, Guillerme T, Cameron SF, Wilson RS,  
734 Weisbecker V. 2020. Skull shape of a widely distributed, endangered marsupial reveals little  
735 evidence of local adaptation between fragmented populations. *Ecology and Evolution* 10:  
736 9707–9720.
- 737 Voss RS, Lunde DP, Jansa SA. 2005. On the Contents of Gracilinanus Gardner and  
738 Creighton, 1989, with the Description of a Previously Unrecognized Clade of Small Didelphid  
739 Marsupials. *American Museum Novitates* 2005: 1–36.
- 740 Ward M, Tulloch AIT, Radford JQ, Williams BA, Reside AE, Macdonald SL, Mayfield HJ,  
741 Maron M, Possingham HP, Vine SJ, O'Connor JL, Massingham EJ, Greenville AC,  
742 Woinarski JCZ, Garnett ST, Lintermans M, Scheele BC, Carwardine J, Nimmo DG,  
743 Lindenmayer DB, Kooyman RM, Simmonds JS, Sontter LJ, Watson JEM. 2020. Impact of  
744 2019–2020 mega-fires on Australian fauna habitat. *Nature Ecology & Evolution* 4: 1321–  
745 1326.
- 746 Weisbecker V, Guillerme T, Speck C, Sherratt E, Abraha HM, Sharp AC, Terhune CE,  
747 Collins S, Johnston S, Panagiotopoulou O. 2019. Individual variation of the masticatory  
748 system dominates 3D skull shape in the herbivory-adapted marsupial wombats. *Frontiers in*  
749 *Zoology* 16: 41.

- 750 Werdelin L. 1986. Comparison of skull shape in marsupial and placental carnivores.  
751 *Australian Journal of Zoology* 34: 109–117.
- 752 Werdelin L. 1987. Jaw Geometry and Molar Morphology in Marsupial Carnivores: Analysis of  
753 a Constraint and Its Macroevolutionary Consequences. *Paleobiology* 13: 342–350.
- 754 Woinarski JCZ, Burbidge AA, Harrison PL. 2015. Ongoing unraveling of a continental fauna:  
755 Decline and extinction of Australian mammals since European settlement. *Proceedings of*  
756 *the National Academy of Sciences* 112: 4531–4540.
- 757 Yezerinac SM, Loughheed SC, Handford P. 1992. Measurement Error and Morphometric  
758 Studies: Statistical Power and Observer Experience. *Systematic Biology* 41: 471–482.
